# Supplementary material for: Changes in Antioxidant Properties and Amounts of Bioactive Compounds during Simulated In Vitro Digestion of Wheat Bread Enriched with Plant Extracts
Source: MDPI journal article supplement (doi:10.3390/molecules26206292), 2021-10-18
Supplement: s1 [file s1]

Supplementary data

**Table S1. Color of different samples of wheat bread.**

| Colour parameter | WB    | Maltodextrin |       |       |       | Inulin |       |       |       |
|------------------|-------|--------------|-------|-------|-------|--------|-------|-------|-------|
|                  |       | WBM          | SM    | HtM   | OM    | WBI    | SI    | HtI   | OI    |
| L*               | 66,20 | 59,60        | 58,80 | 49,00 | 34,70 | 58,40  | 56,50 | 48,10 | 32,60 |
| a*               | -2,00 | 2,40         | 3,50  | 4,20  | 8,80  | 2,30   | 4,00  | 4,80  | 9,20  |
| b*               | 11,30 | 14,40        | 16,70 | 9,40  | 8,60  | 14,10  | 17,00 | 8,90  | 7,60  |

\* Abbreviations: WB – wheat bread; WBM – wheat bread with maltodextrin; SM – wheat bread enriched with soy extracts in maltodextrin; HtM – wheat bread enriched with hawthorn extracts in maltodextrin; OM – wheat bread enriched with onion husk extracts in maltodextrin; WBI – wheat bread with inulin; SI – wheat bread enriched with soy extracts in inulin; HtI – wheat bread enriched with hawthorn extracts in inulin; OI – wheat bread enriched with onion husk extracts in inulin. The data are expressed as mean (n = 3).

**Table S2. Characteristics of soy extracts microcapsules and bread with addition of microcapsules of soy extracts encapsulated with inulin and maltodextrin**

|                                          |                        | Maltodextrin  |                          | Inulin        |                          |
|------------------------------------------|------------------------|---------------|--------------------------|---------------|--------------------------|
|                                          |                        | Microcapsules | Bread with microcapsules | Microcapsules | Bread with microcapsules |
| Isoflavones content<br>[mg/g D.W.]       | Daidzin                | 38.2          | 0.72                     | 30.6          | 0.88                     |
|                                          | Glycitin               | 5.1           | 0.14                     | 4.1           | 0.22                     |
|                                          | Genistin               | 54.3          | 2.3                      | 45.1          | 2.57                     |
|                                          | Malonyldaidzin         | 26.8          | 1.31                     | 21.6          | 2.42                     |
|                                          | Malonylglycitin        | 5.5           | 0.26                     | 4.6           | 0.46                     |
|                                          | Malonylgenistin isomer | 4.7           | 1.91                     | 3.7           | 0.35                     |
|                                          | Malonylgenistein       | 43.0          | 3.85                     | 35.1          | 3.06                     |
|                                          | Daidzein               | 9.9           | 4.39                     | 8.8           | 4.6                      |
|                                          | Genistein              | 11.9          | 3.84                     | 11.6          | 8.11                     |
|                                          | Sum of polyphenols     | 199.4         | 18.17                    | 165.5         | 22.67                    |
| Antioxidant activity<br>[μmol TE/g D.W.] | ABTS <sup>++</sup>     | 319           | 28.16                    | 298           | 27.51                    |
|                                          | FRAP                   | 565           | 17.57                    | 383           | 12.07                    |

**Table S3. Characteristics of hawthorn extracts microcapsules and bread with addition of microcapsules of hawthorn extracts encapsulated with inulin and maltodextrin**

|                                          |                          | Maltodextrin  |                          | Inulin        |                          |
|------------------------------------------|--------------------------|---------------|--------------------------|---------------|--------------------------|
|                                          |                          | Microcapsules | Bread with microcapsules | Microcapsules | Bread with microcapsules |
| Procyanidin content<br>[mg/g D.W.]       | Procyanidin dimer B4     | 44.0          | nd                       | 42.2          | nd                       |
|                                          | Procyanidin dimer B5     | 25.6          | 0.16                     | 22.0          | 0.18                     |
|                                          | Procyanidin dimer B2     | 179.6         | 0.1                      | 170.8         | 0.11                     |
|                                          | (–)-Epicatechin          | 253.2         | 0.72                     | 241.6         | 0.77                     |
|                                          | Procyanidin trimer C1    | 109.2         | 1.13                     | 105.2         | 1.17                     |
|                                          | Procyanidin tetramer I   | 55.6          | 0.3                      | 52.8          | 0.32                     |
|                                          | Procyanidin tetramer II  | 44.4          | 0.06                     | 43.6          | 0.06                     |
|                                          | Procyanidin trimer       | 10.0          | 0.04                     | 8.4           | 0.04                     |
|                                          | Procyanidin tetramer III | 29.2          | 0.1                      | 27.2          | 0.12                     |
|                                          | Sum of polyphenols       | 750.8         | 2.52                     | 713.6         | 2.65                     |
| Antioxidant activity<br>[μmol TE/g D.W.] | ABTS <sup>+</sup>        | 2823          | 112.74                   | 2768          | 120.27                   |
|                                          | FRAP                     | 1129          | 23.58                    | 1082          | 16.47                    |

**Table S4. Characteristics of onion extracts microcapsules and bread with addition of microcapsules of onion extracts encapsulated with inulin and maltodextrin**

|                                          |                           | Maltodextrin  |                          | Inulin        |                          |
|------------------------------------------|---------------------------|---------------|--------------------------|---------------|--------------------------|
|                                          |                           | Microcapsules | Bread with microcapsules | Microcapsules | Bread with microcapsules |
| Flavonols content<br>[mg/g D.W.]         | Quercetin 7,4-diglucoside | 1.7           | nd                       | 2.0           | nd                       |
|                                          | Quercetin 3,4-diglucoside | 2.0           | nd                       | 2.1           | nd                       |
|                                          | Quercetin 3-glucoside     | 1.6           | nd                       | 2.5           | nd                       |
|                                          | Quercetin 4-glucoside     | 122.8         | 0.76                     | 133.3         | 0.54                     |
|                                          | Isorhamnetin 4-glucoside  | 4.7           | nd                       | 5.3           | nd                       |
|                                          | Quercetin                 | 792.2         | 17.59                    | 880.1         | 15.65                    |
|                                          | Sum of polyphenols        | 925.0         | 18.35                    | 1025.2        | 16.9                     |
| Antioxidant activity<br>[μmol TE/g D.W.] | ABTS <sup>+</sup>         | 525           | 133.02                   | 331           | 125.99                   |
|                                          | FRAP                      | 627           | 17.5                     | 440           | 12.98                    |
